# Supplementary material
Source: PubMed Central journal article supplement (PMC6486911)
Supplement: 13280_2018_1087_MOESM1_ESM.pdf [file 13280_2018_1087_MOESM1_ESM.pdf]

## Electronic Supplementary Material

**Title:** How Smart is Smart Growth? Examining the Environmental Validation Behind City Compaction

**Journal:** *Ambio*

**Authors:** Åsa Gren\*, Johan Colding, Meta Berghauser Pont and Lars Marcus

\**Corresponding author*

**Author affiliation of corresponding author:** The Beijer Institute of Ecological Economics, The Royal Swedish Academy of Sciences, Lilla Frescativägen 4, 104 05 Stockholm, Sweden  
e-mail:asa.gren@beijer.kva.se

Numbered list of the 29 references included in the review.

#1. Salvati, L., M. Munafo, V. G. Morelli, A. Sabbi. 2012. Low-density settlements and land use changes in a mediterranean urban region. *Landscape and Urban Planning*. 105: 43– 52.

#2. Hale, J. D., A. J. Fairbrass, T. J. Matthews, and J. P. Sadler. 2012. Habitat composition and connectivity predicts bat presence and activity at foraging sites in a large UK conurbation. *PLoS ONE* 7(3). doi:10.1371/journal.pone.0033300.

#3. Liu, Y., Y. Song, and H. P. Arp. 2012. Examination of the relationship between urban form and urban eco-Efficiency in China. *Habitat International* 36: 171e177.

#4. Holden, E. and K. Linnerud. 2011. Troublesome leisure travel. *Urban Studies* 48(14): 3087-3106.

#5. Miller, C., R. Schroeter, K. Houghton, P. Mees, P. Jones, and C. Attwater. 2011. Congress papers from the planning institute of Australia 2011 national congress." *Australian Planner* 48(3): 183-236.

#6. Ferreira, A., and P. Bate. 2011. On why planning should not reinforce self-reinforcing trends: A cautionary analysis of the compact-City proposal applied to large cities. *Environment and Planning B: Planning and Design* 38: 231-247.

#7. Lau, S. S. Y., F. Yang, J. Tai, X. L. Wu, and J. Wang. 2011. "The study of summer-time heat island, built form and fabric in a densely built urban environment in compact Chinese cities. Hong Kong, Guangzhou. *International. Journal of Sustainable Development* 14: 30-48.

#8. Boarnet, M. G., K. Joh, W. Siembab, W. Fulton, and M. T. Nguyen. 2010. Retrofitting the suburbs to increase walking. Evidence from a land-use–travel study. *Urban Studies* 48(1): 129-159.

#9. Stone, B., J. J. Hess, and H. Frumkin 2010. Urban form and extreme heat events. Are sprawling cities more vulnerable to climate change than compact cities? *Environmental Health Perspective* 118: 425–1428. doi:10.1289/ehp.0901879 [Online 23 June 2010]

#10. Dave, S. 2010. High urban densities in developing countries. A sustainable solution? *Built Environment* 36(1): 9-27.

#11. Chen, H., B. Jia, and S. S. Y. Lau. 2008. Sustainable urban form for Chinese compact cities. Challenges of a rapid urbanized economy. *Habitat International* 32: 28–40.

#12. Stone B. Jr., 2008. Urban sprawl and air quality in large US cities. *Journal of Environmental Management* 86: 688–698.

- #13. Stone, B., A. Mednick, T. Holloway, and S. Spak. 2007. Is compact growth good for air quality? *Journal of American Planning Association* 73(4): 404-418.
- #14. Pauleit, S., and Y. Golding. 2005. The spatial impact of urban compaction. A fine-scale investigation based on Merseyside. *Town Planning Review* 76 (2): 143-166 .  
<https://doi.org/10.3828/tpr.76.2.3>
- #15. S. Pauleit, R. Ennos, and Y. Golding. 2005. Modeling the environmental impacts of urban land use and land cover change. A study in Merseyside, UK." *Landscape and Urban Planning*. 71: 295–310.
- #16. Cameron, I. J. R., T. Kenworthy, and J. Lyons 2003. Understanding and predicting private motorised urban mobility. *Transportation Research Part D* 8: 267–283.
- #17. Alexander, D. and R. Tomalty. 2002. Smart growth and sustainable development. Challenges, solutions and policy directions. *Local Environment* 7 (4): 397–409.
- #18. Stone, B. and M. O. Rodgers. 2001. Urban form and thermal efficiency. How the design of cities influences the urban heat island effect." *Journal of the American Planning Association* 67 (1): 186-198.
- #19. Beardsley, K., J. H. Thorne, N. E. Roth, S. Gao, and M. C. McCoy. 2009. Assessing the influence of rapid urban growth and regional policies on biological resources. *Landscape and Urban Planning* 93: 172–183.
- #20. Hill, E., J. H. Dorfmanb, and E. Kramer. 2010. Evaluating the impact of government land use policies on tree canopy coverage. *Land Use Policy* 27: 407–414.
- #21. McDonald, R. I., R. T. R. Forman, and P. Kareiva. 2010. Open space loss and inequality in United States' cities 1990–2000. *PLoS ONE* 5(3): e9509. doi:10.1371/journal.pone.0009509.
- #22. Larondelle, N., and S. Lauf. 2016. Balancing demand and supply of multiple urban ecosystem services on different spatial scales. *Ecosystem Services* 22: 18–31.
- #23. Mahmuda, S., and R. Webb. 2016. Climate adaptation and urban planning for heat islands. A case study of the Australian capital territory. *Australian Planner* 53(2): 127-142. DOI: 10.1080/07293682.2015.1136661.
- #24. Senbel, M., M. van der Laan, R. Kellett, C. Girling, and J. Stuart. 2016. Can form-based code help reduce municipal greenhouse gas emissions in small towns? The case of Revelstoke, British Columbia. *Canadian Journal of Urban Research* 22 (1): 72-92.

- #25. Liang, H., D. Chen, and Q. Zhang. 2017. Assessing urban green space distribution in a compact megacity by landscape metrics. *Journal of Environmental Engineering and Landscape Management* 25(1): 64-74. DOI: 10.3846/16486897.2016.1210157.
- #26. Almanza, E., M. Jerrett, G. Dunton, E. Seto, and M. A. Pentz. 2012. A study of community design, greenness, and physical activity in children using satellite, GPS and accelerometer Data. *Health and Place* 18: 46–54.
- #27. Shen, Y.-S., and S.-C. C. Lung. 2016. Can green structure reduce the mortality of cardiovascular diseases? *Science of the Total Environment* 566–567: 1159–1167. doi: 10.1016/j.scitotenv.2016.05.159.
- #28. C. Zhang, and Y. Lin. 2012. Panel estimation for urbanization, energy consumption and CO<sub>2</sub> emissions. A regional analysis in China. *Energy Policy* 49: 488–498.
- #29. Ou, J., X. Liu, X. Li, and Y. Chen. 2013. Quantifying the relationship between urban forms and carbon emissions using panel data analysis. *Landscape Ecology* 28: 1889–1907. DOI 10.1007/s10980-013-9943-4.
